# Supplementary material for: Growth Temperature Influence on Atomic-Layer-Deposited In2O3 Thin Films and Their Application in Inorganic Perovskite Solar Cells
Source: MDPI journal article supplement (doi:10.3390/nano11082047), 2021-08-11
Supplement: s1 [file s1]

## Supplementary Materials

### Growth Temperature Influence on Atomic-Layer-Deposited $\text{In}_2\text{O}_3$ Thin Films and Their Application in Inorganic Perovskite Solar Cells

Umme Farva <sup>1</sup>, Hyeong Woo Lee <sup>1</sup>, RiNa Kim <sup>1</sup>, Dong-Gun Lee <sup>2</sup>, Dong-Won Kang <sup>2,\*</sup> and Jeha Kim <sup>1,\*</sup>

<sup>1</sup> Department of Energy Convergence Engineering, Cheongju University, Cheongju 28503, Korea; ummefarva@gmail.com (U.F.); hwkj0224@gmail.com (H.W.L.); kimrina74@gmail.com (R.K.)

<sup>2</sup> School of Energy Systems Engineering, Chung-Ang University, Seoul 06974, Korea; padawan1215@naver.com

\* Correspondence: jeha@cju.ac.kr (J.K.); kangdwn@cau.ac.kr (D.-W.K.)

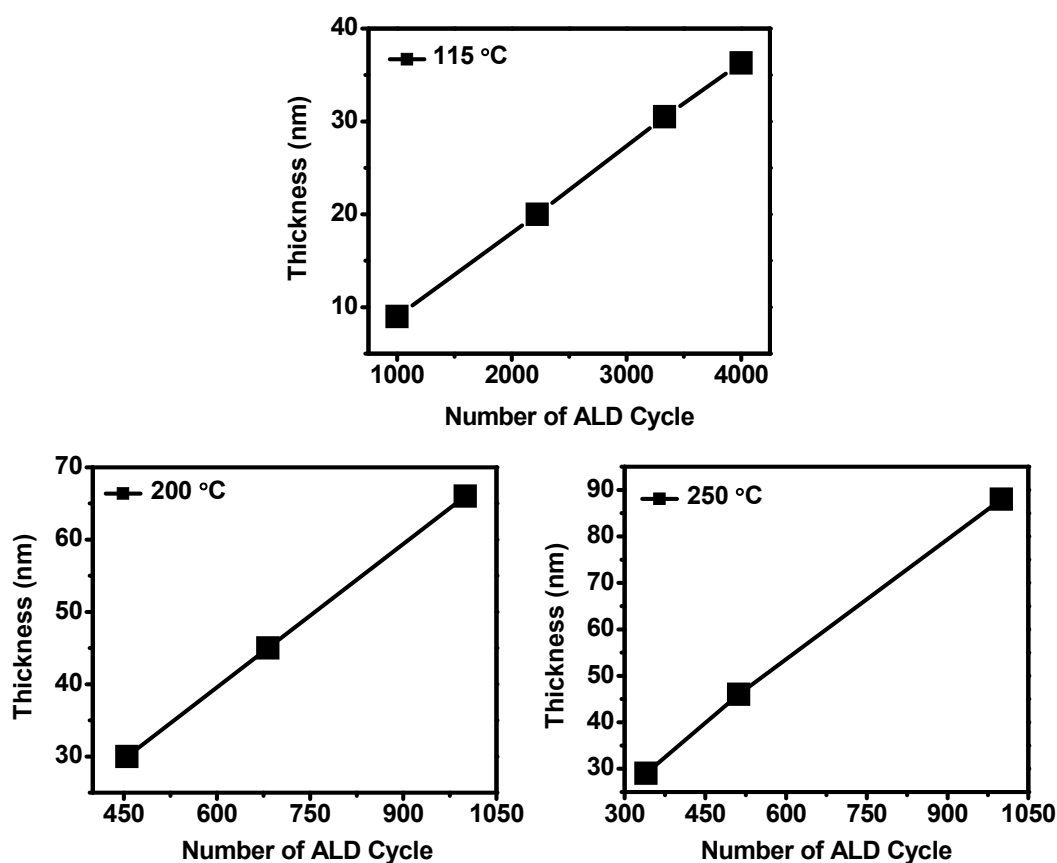

**Figure S1.** ALD deposited  $\text{In}_2\text{O}_3$  film thickness as a function of the number of ALD cycles for film deposited at 115 °C, 200 °C and 250 °C on the Si substrate.

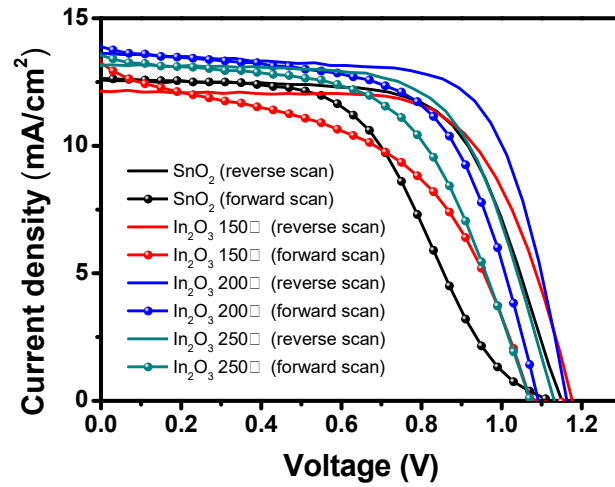

**Figure S2.** Hysteresis observation for developed CsPbI<sub>2</sub>Br perovskite solar cells with different ETLs.

**Table S1.** Photovoltaic parameters and hysteresis index of fabricated CsPbI<sub>2</sub>Br perovskite solar cells with different ETLs.

| Sample                                            | J <sub>sc</sub><br>(mA/cm <sup>2</sup> ) | V <sub>oc</sub><br>(V) | FF<br>(%) | PCE<br>(%) | Hysteresis<br>Index (HI) |
|---------------------------------------------------|------------------------------------------|------------------------|-----------|------------|--------------------------|
| SnO <sub>2</sub> reverse scan                     | 12.54                                    | 1.12                   | 67.89     | 9.52       | 0.75                     |
| SnO <sub>2</sub> forward scan                     | 12.62                                    | 1.11                   | 50.76     | 7.11       |                          |
| In <sub>2</sub> O <sub>3</sub> 150°C reverse scan | 13.18                                    | 1.10                   | 67.37     | 9.77       | 0.85                     |
| In <sub>2</sub> O <sub>3</sub> 150°C forward scan | 13.41                                    | 1.07                   | 58.06     | 8.33       |                          |
| In <sub>2</sub> O <sub>3</sub> 200°C reverse scan | 12.13                                    | 1.15                   | 68.54     | 9.53       | 0.74                     |
| In <sub>2</sub> O <sub>3</sub> 200°C forward scan | 12.92                                    | 1.07                   | 50.71     | 7.01       |                          |
| In <sub>2</sub> O <sub>3</sub> 250°C reverse scan | 13.64                                    | 1.13                   | 70.99     | 10.97      | 0.85                     |
| In <sub>2</sub> O <sub>3</sub> 250°C forward scan | 13.75                                    | 1.07                   | 62.99     | 9.27       |                          |
